# Supplementary material for: Tungsten doped manganese silicate films as stable and efficient oxygen evolution catalysts in near-neutral media
Source: Royal Society of Chemistry journal article supplement (doi:10.1039/d1ta01524a), 2021-01-01
Supplement: d1ta01524a1.pdf [file d1ta01524a1.pdf]

## Supporting Information

### **Tungsten Doped Manganese Silicate Films as Stable and Efficient Oxygen Evolution Catalysts in Near-Neutral Media**

*Shuairu Zhu<sup>1,2</sup>, Jiabo Le<sup>1</sup>, Jianming Li<sup>4</sup>, Deyu Liu<sup>1,3\*</sup>, and Yongbo Kuang<sup>1,3\*</sup>*

*<sup>1</sup>Ningbo Institute of Materials Technology and Engineering, Chinese Academy of Sciences, 1219 Zhongguan West Road, Ningbo, Zhejiang 315201, China*

*<sup>2</sup>University of Chinese Academy of Sciences, 19(A) Yuquan Road, Beijing 100049, China*

*<sup>3</sup>Center of Materials Science and Optoelectronics Engineering, University of Chinese Academy of Sciences, 19(A) Yuquan Road, Beijing 100049, China*

*<sup>4</sup>Research Center of New Energy, Research Institute of Petroleum Exploration & Development (RIPED), 20 Xueyuan Road, Beijing 100083, China*

*\*email: kuangyongbo@nimte.ac.cn (Kuang, Y. B.); liudeyu@nimte.ac.cn (Liu, D. Y.)*

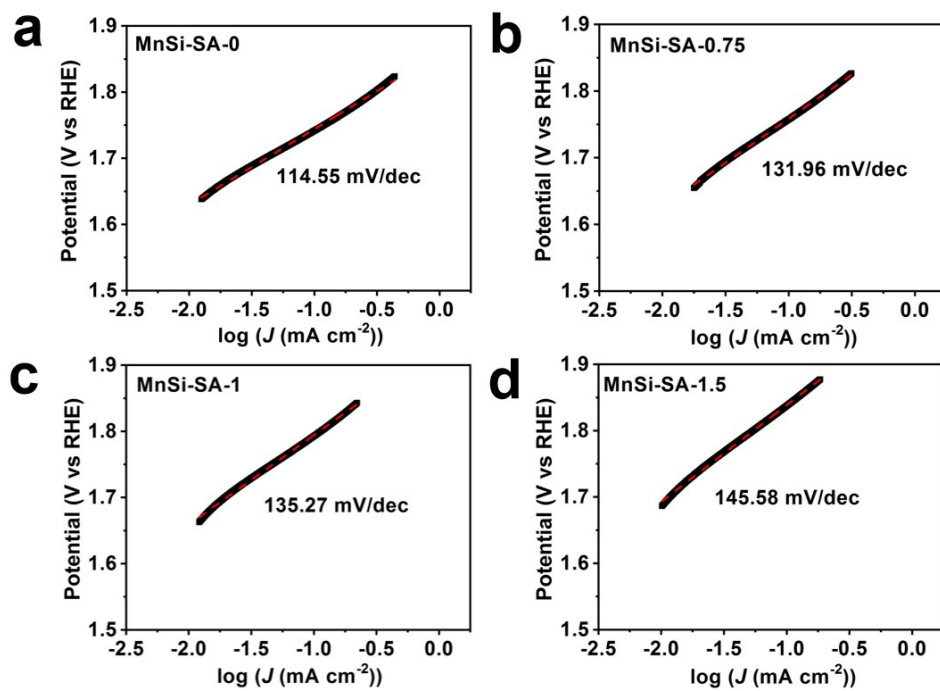

Figure S1. a-d) Tafel plots of the samples in 1 M PBS (pH=7).

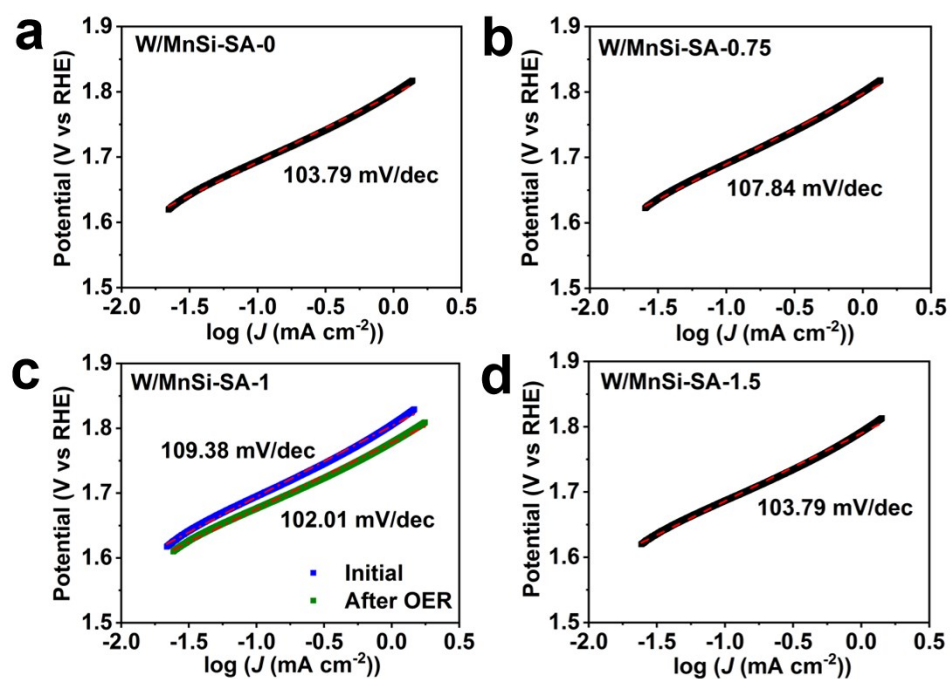

Figure S2. a-d) Tafel plots of the samples in 1 M PBS (pH=7).

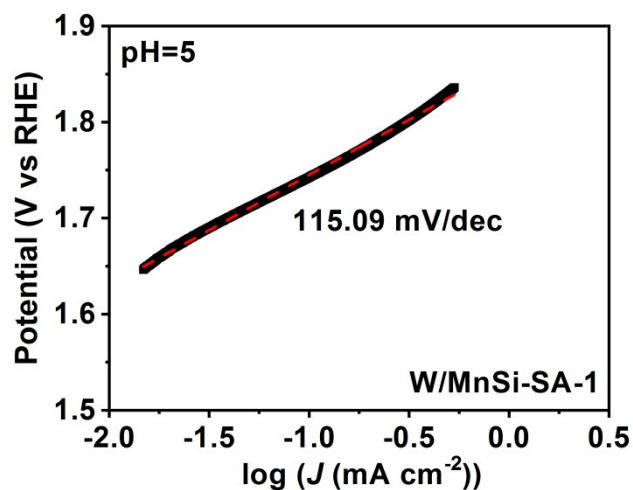

**Figure S3.** Tafel plot of the W/MnSi-SA-1 in 1 M PBS (pH=5).

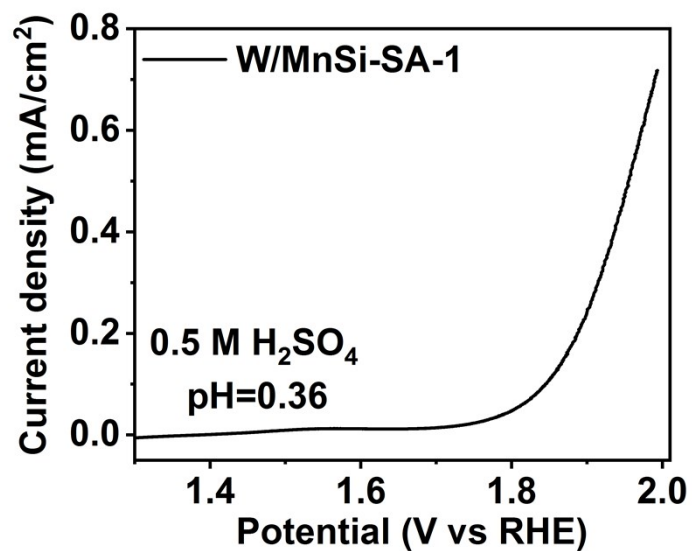

**Figure S4.** Oxygen evolution properties of the prepared catalysts in acid media (5 mV s<sup>-1</sup> without *iR* compensation).

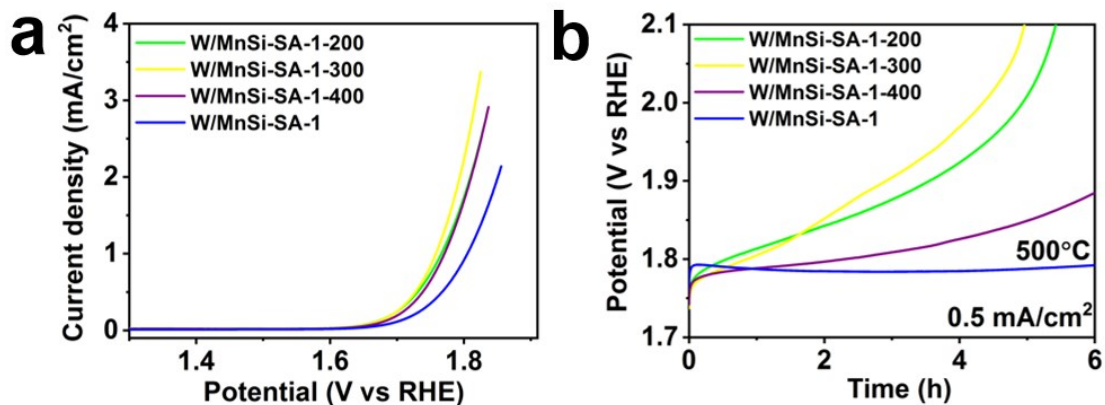

**Figure S5.** Oxygen evolution properties of the prepared catalysts in 1 M PBS (pH=7). a) polarization curves at a scan rate of  $5 \text{ mV s}^{-1}$  with  $iR$  compensation, and b) chronopotentiometric curves for the different calcination temperatures of samples.

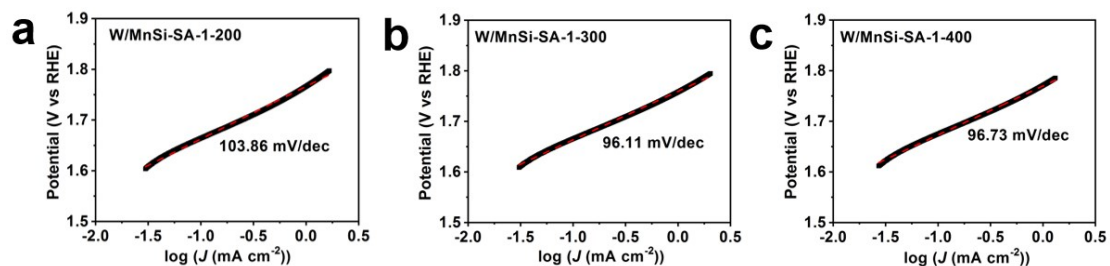

**Figure S6.** a-c) Tafel plots of the samples in 1 M PBS (pH=7).

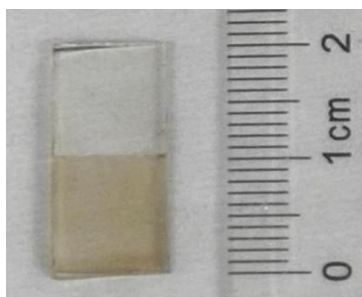

**Figure S7.** The photograph of W/MnSi-SA-1/FTO.

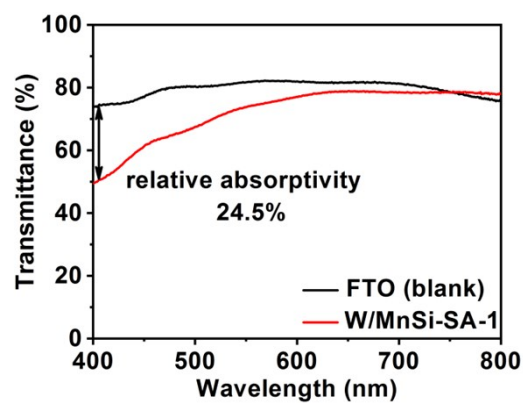

**Figure S8.** The transparency of W/MnSi-SA-1/FTO.

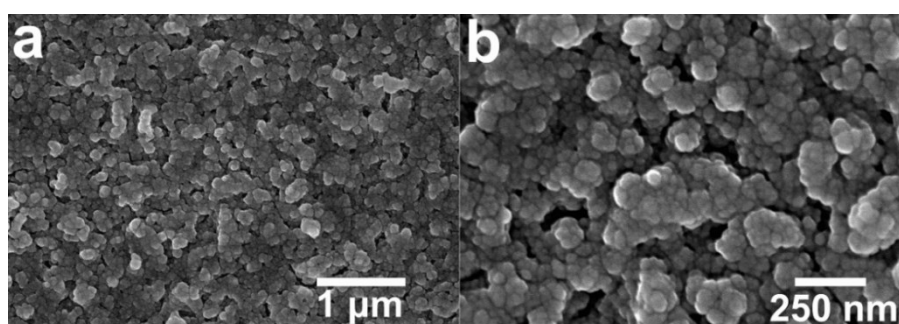

**Figure S9.** a-b) SEM images of W/MnSi-SA-1 after stability test.

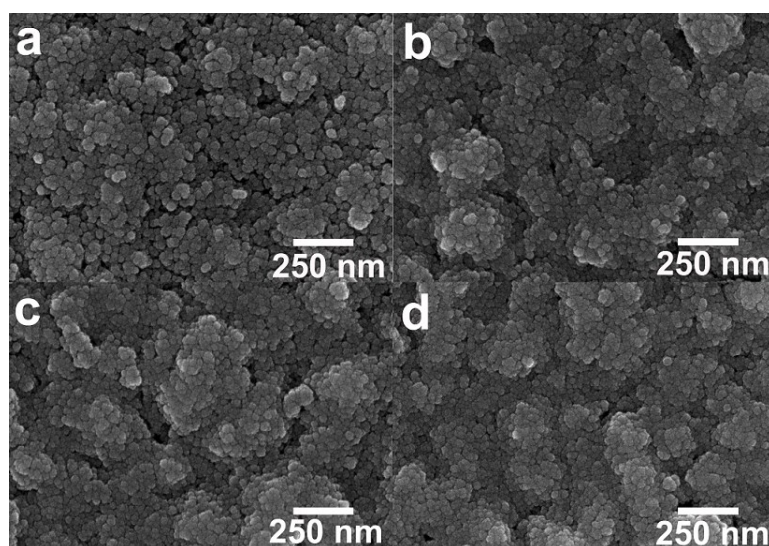

**Figure S10.** SEM images of a) W/MnSi-SA-1-200, b) W/MnSi-SA-1-300, c) W/MnSi-SA-1-400, d) W/MnSi-SA-1.

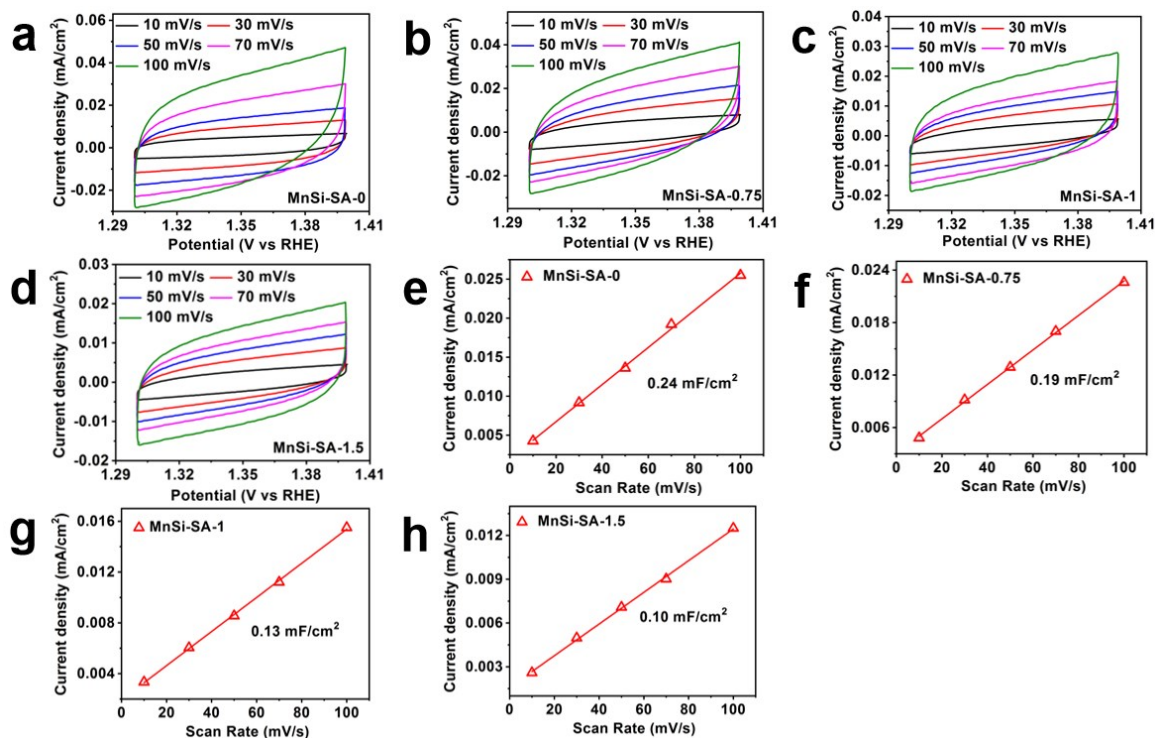

**Figure S11.** a-d) CV curves of electrodes at scan rate from 10 to 100 mV s<sup>-1</sup> and e-h) the corresponding evaluation of C<sub>dl</sub> in 1 M PBS (pH=7).

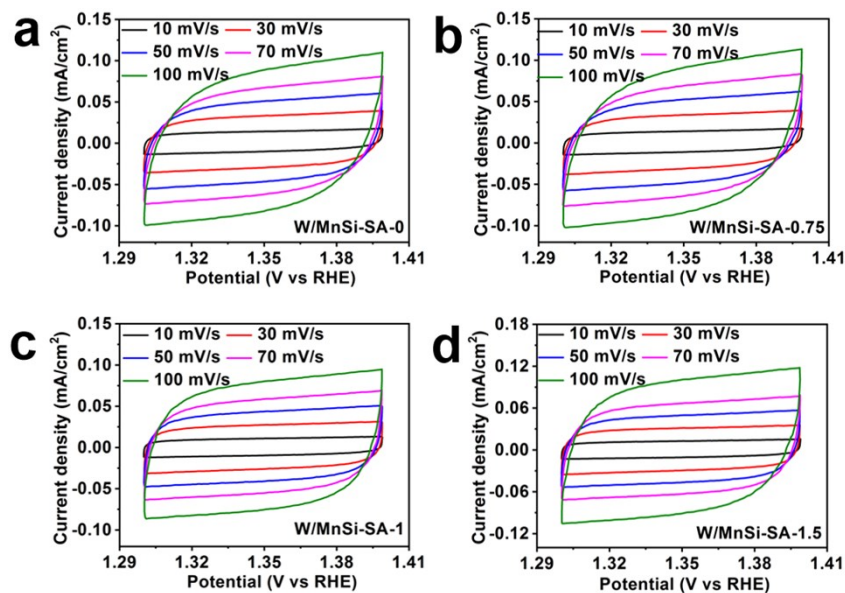

**Figure S12.** a-d) CV curves of electrodes at scan rate from 10 to 100 mV s<sup>-1</sup> in 1 M PBS (pH=7).



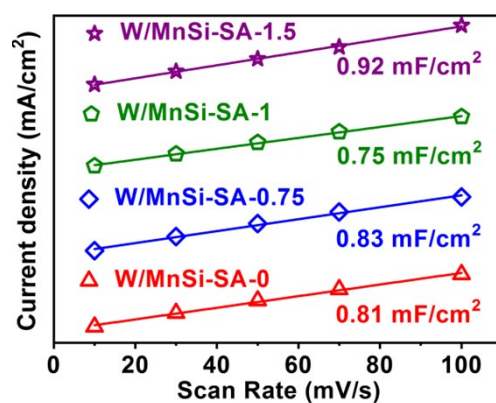

**Figure S13.** The evaluation of double-layer capacitances ( $C_{dl}$ ) for the samples in 1 M PBS (pH=7).

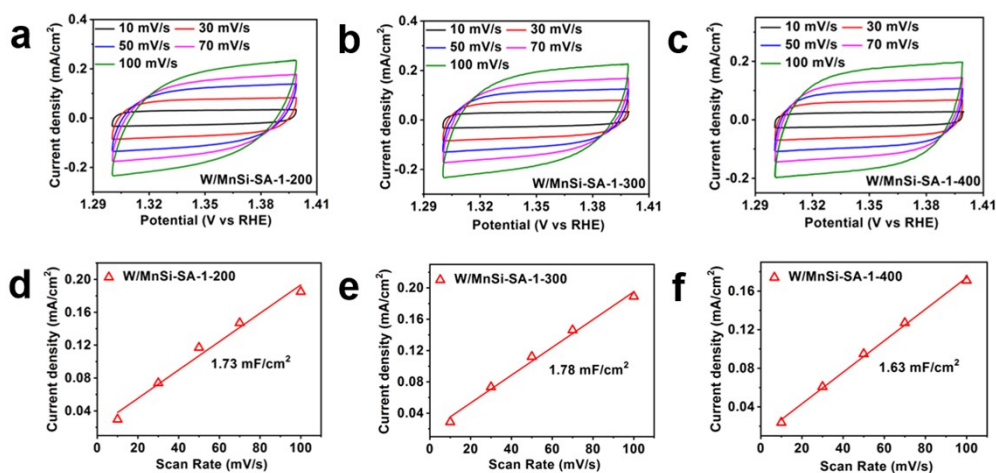

**Figure S14.** a-c) CV curves of electrodes at scan rate from 10 to 100  $mV s^{-1}$  and d-f) the evaluation of double-layer capacitances ( $C_{dl}$ ) for the samples in 1 M PBS (pH=7).

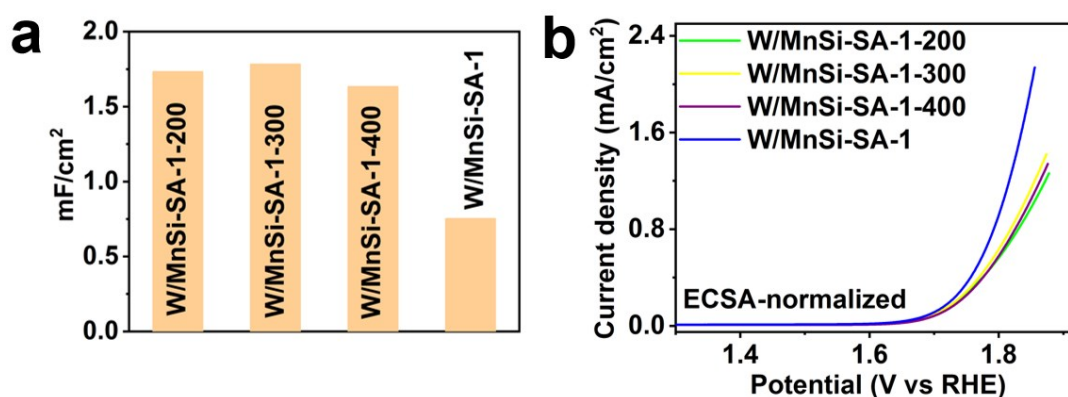

**Figure S15.** a) the evaluation of double-layer capacitance ( $C_{dl}$ ) for the samples. b) ECSA normalized OER polarization curves of samples at a scan rate of 5  $mV s^{-1}$  with  $iR$  compensation in 1 M PBS (pH=7).

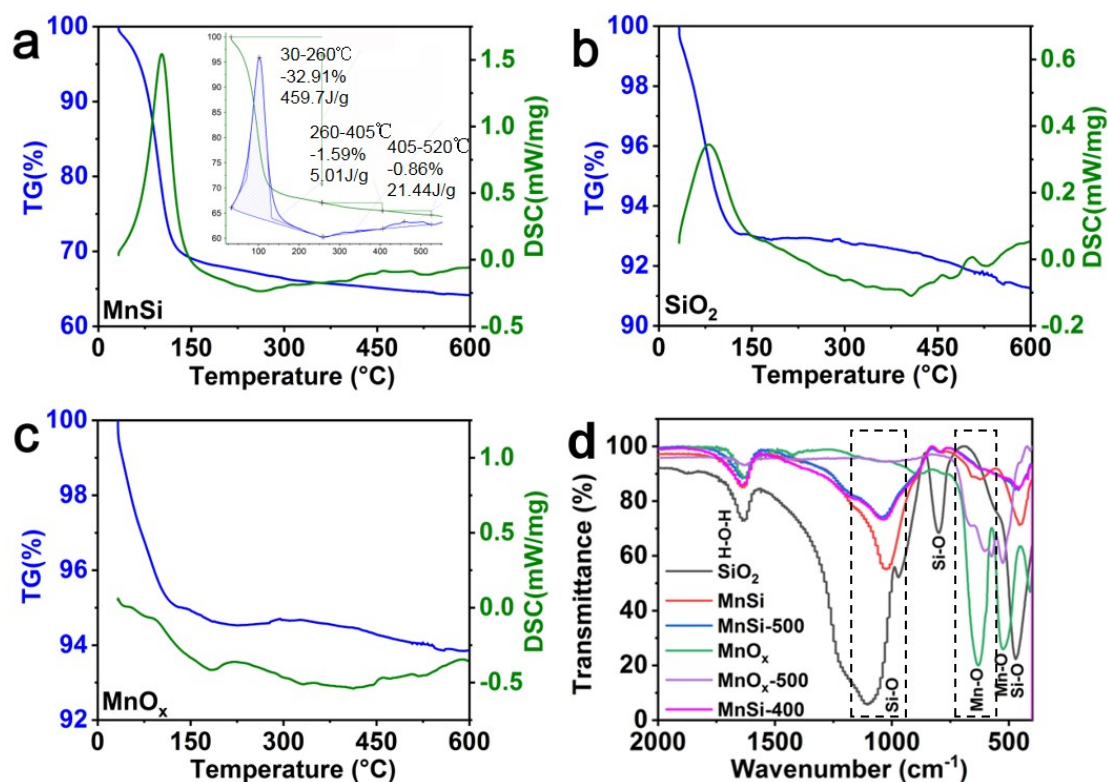

**Figure S16.** a-c) Thermal analysis of samples under air atmosphere d) FT-IR spectra of samples.

**Powders Preparation.** The MnSi powder was obtained by microwave reaction. Commercial SiO<sub>2</sub> powder (0.12 g), Manganese acetate (MnC<sub>4</sub>H<sub>6</sub>O<sub>4</sub>·4H<sub>2</sub>O, 2 mmol, Aladdin) and sodium acetate (NaC<sub>2</sub>H<sub>3</sub>O<sub>2</sub>·3H<sub>2</sub>O, 1 mmol, Aladdin) were added into a quartz vial containing a mixed solution of ethanol absolute (10 mL) and deionized water (5 mL) to form a homogeneous solution. Subsequently, the above solution was heated in a microwave reaction apparatus (Explorer 12) to 140 °C for 30 min. After the microwave reaction, the sample was rinsed with deionized water, ethanol and then drying at 60°C. For comparison, MnO<sub>x</sub> powder also acquired by same microwave reaction without addition of SiO<sub>2</sub> powder. Finally, MnSi and MnO<sub>x</sub> powders are calcinated at 500 °C for 2h, named at MnSi-500 and MnO<sub>x</sub>-500 respectively. MnSi powder is calcinated at 400 °C for 2h, named at MnSi-400.



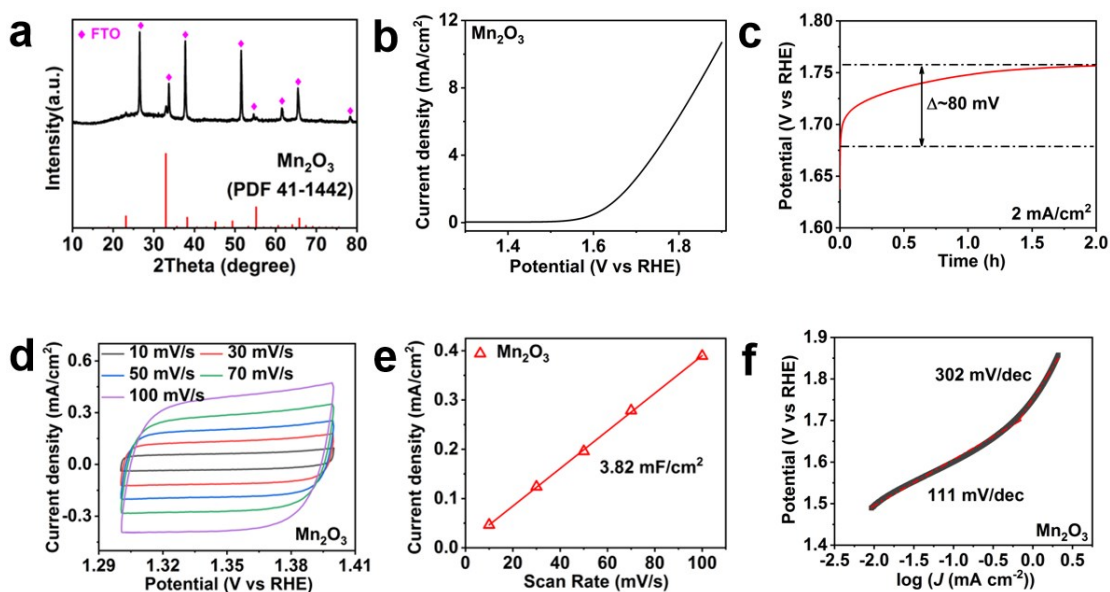

**Figure S17.** Oxygen evolution properties of the prepared  $\text{Mn}_2\text{O}_3$  in 1 M PBS (pH=7). (a) XRD patterns. (b) polarization curves of electrode at a scan rate of  $5 \text{ mV s}^{-1}$  without  $iR$  compensation. (c) chronopotentiometry curves of electrode with constant current density. (d) CV curves of electrode at scan rate from 10 to  $100 \text{ mV s}^{-1}$ . (e) the evaluation of double-layer capacitances ( $C_{dl}$ ). (f) Tafel slopes.

**$\text{Mn}_2\text{O}_3$  Film Preparation.**  $\text{Mn}_2\text{O}_3$  Film was prepared by galvanostatic deposition onto FTO ( $1\text{cm}\times 2\text{cm}$ ) at a current density of  $0.25 \text{ mA/cm}^2$  in a three-electrode system.<sup>1</sup> FTO was used as working electrode. A saturated Ag/AgCl electrode and a platinum wire were used as the reference and counter electrodes, respectively. Electrochemical deposition was carried out in a homogeneous solution of  $0.25 \text{ M MnCl}_2\cdot 4\text{H}_2\text{O}$  and  $0.25 \text{ M Na}_2\text{SO}_4$  (1:1 ratio) for 10 min. The film was then rinsed thoroughly with deionized water and calcinated at  $773 \text{ K}$  up to 2 h under air.

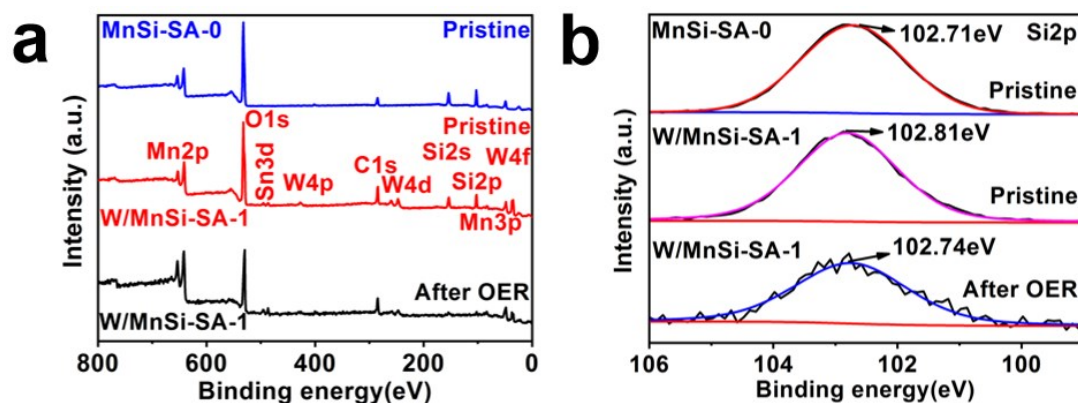

**Figure S18.** XPS data of the a) survey, and b) Si 2p of the samples.

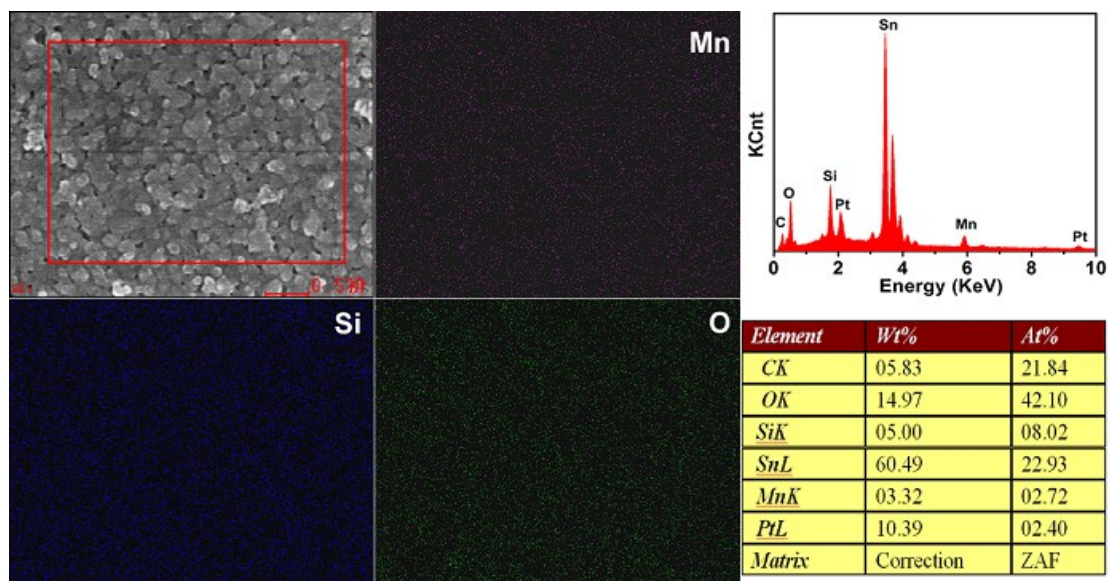

**Figure S19.** The EDS analyses and mapping of W/MnSi-SA-1/FTO.

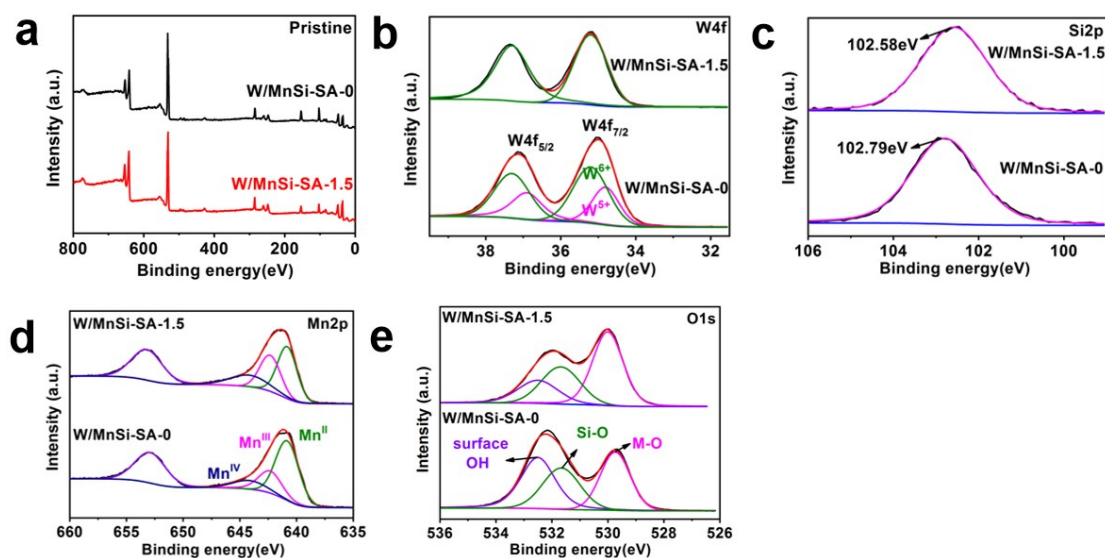

**Figure S20.** XPS data of the a) survey, b) W 4f, c) Si 2p, d) Mn 2p, and e) O 1s of the samples.

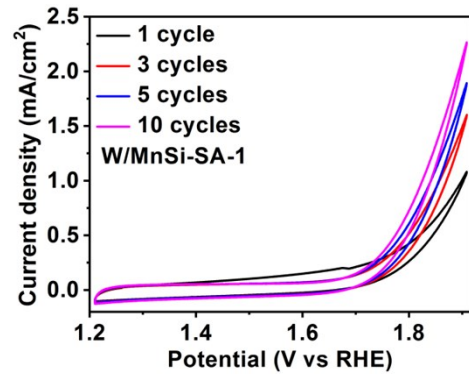

**Figure S21.** Cyclic voltammetry curves ( $50 \text{ mV s}^{-1}$ ) of W/MnSi-SA-1 in 1 M PBS (pH=7).

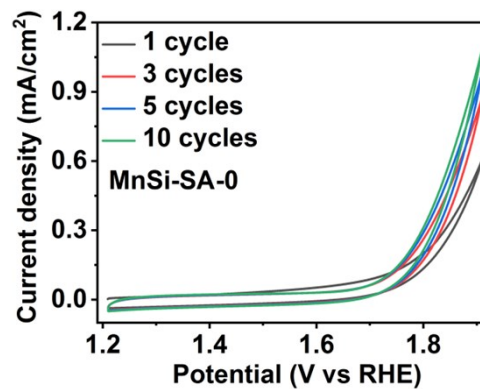

**Figure S22.** Cyclic voltammetry curves ( $50 \text{ mV s}^{-1}$ ) of MnSi-SA-0 1 M PBS (pH=7).

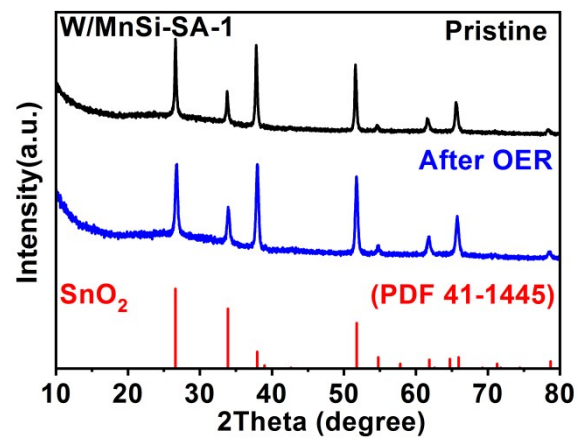

**Figure S23.** XRD patterns of W/MnSi-SA-1/FTO.

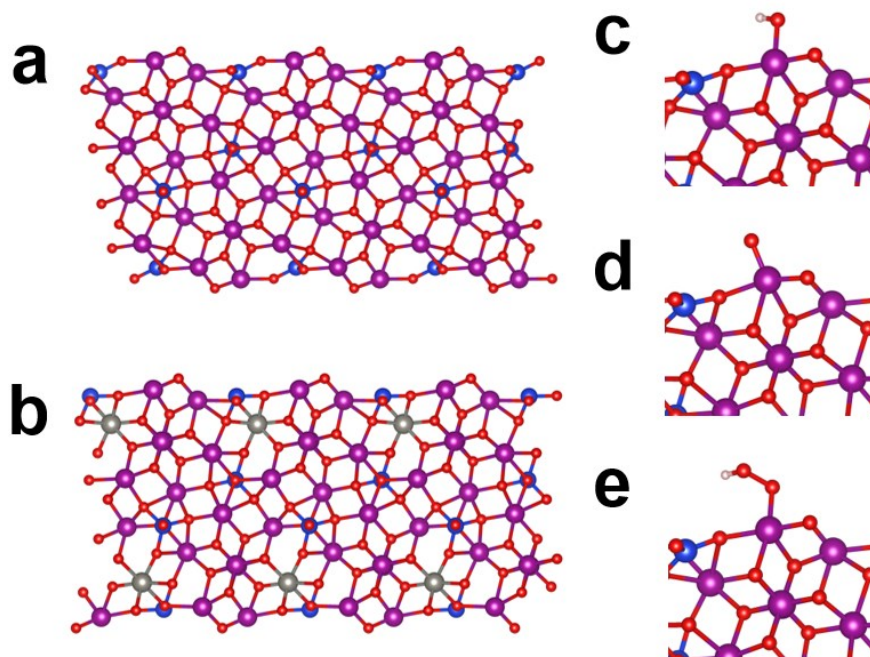

**Figure S24.** Models of  $\text{Mn}_4\text{SiO}_7(100)$  surface (a) and  $\text{W}_x\text{Mn}_{4-x}\text{SiO}_7(100)$  surface (b). (c)-(e),  $\text{Mn}_4\text{SiO}_7(100)$  surfaces with adsorbed  $\text{OH}^*$ ,  $\text{O}^*$  and  $\text{OOH}^*$ , respectively. The purple, grey, blue, red and white balls represent Mn, W, Si, O and H atoms, respectively.

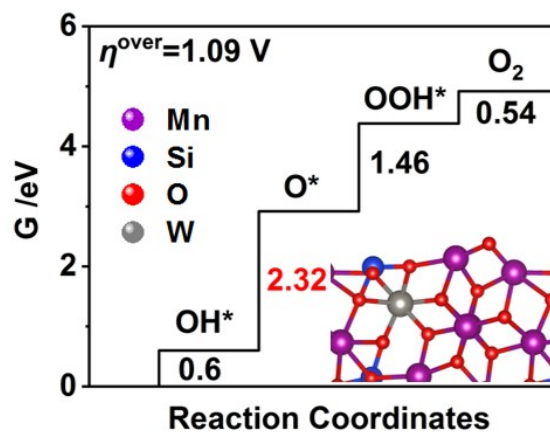

**Figure S25.** Gibbs free-energy diagram for  $\text{W}_x\text{Mn}_{4-x}\text{SiO}_7$  (The inset shows the  $\text{W}_x\text{Mn}_{4-x}\text{SiO}_7(100)$  surface).



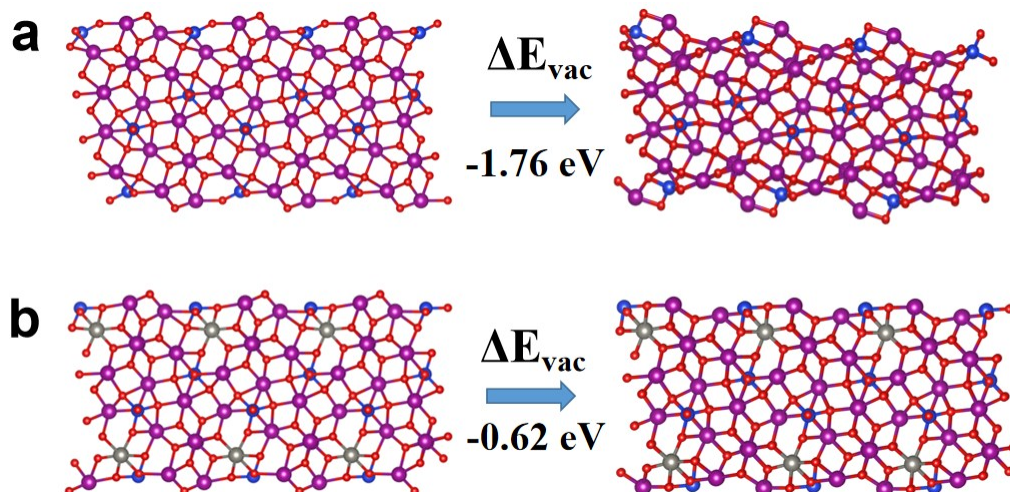

**Figure S26.** The calculated formation energies of oxygen vacancies on a)  $\text{Mn}_4\text{SiO}_7(100)$ , and b)  $\text{W}_x\text{Mn}_{4-x}\text{SiO}_7(100)$  surfaces. It is shown that the structure of the  $\text{Mn}_4\text{SiO}_7(100)$  surface has significant reconstruction after the formation of oxygen vacancy. In contrast, the doping of W greatly reduces this deformation, suggesting that the doping of W has a significant promoting effect on the stability of the structure.

**Table S1.** Naming rules.

| samples         | method                  |                |                         |
|-----------------|-------------------------|----------------|-------------------------|
|                 | evaporator source       | sodium acetate | calcination temperature |
| MnSi-SA-0       | $\text{SiO}_2$          | 0 mmol         | 773 K                   |
| MnSi-SA-0.75    | $\text{SiO}_2$          | 0.75 mmol      | 773 K                   |
| MnSi-SA-1       | $\text{SiO}_2$          | 1 mmol         | 773 K                   |
| MnSi-SA-1.5     | $\text{SiO}_2$          | 1.5 mmol       | 773 K                   |
| W/MnSi-SA-0     | $\text{SiO}_2+\text{W}$ | 0 mmol         | 773 K                   |
| W/MnSi-SA-0.75  | $\text{SiO}_2+\text{W}$ | 0.75 mmol      | 773 K                   |
| W/MnSi-SA-1     | $\text{SiO}_2+\text{W}$ | 1 mmol         | 773 K                   |
| W/MnSi-SA-1.5   | $\text{SiO}_2+\text{W}$ | 1.5 mmol       | 773 K                   |
| W/MnSi-SA-1-200 | $\text{SiO}_2+\text{W}$ | 1 mmol         | 473 K                   |
| W/MnSi-SA-1-300 | $\text{SiO}_2+\text{W}$ | 1 mmol         | 573 K                   |
| W/MnSi-SA-1-400 | $\text{SiO}_2+\text{W}$ | 1 mmol         | 673 K                   |



**Table S2.** The comparison of the electrochemical performances of Mn-based and noble metal oxygen evolution catalysts in near-neutral media.

| catalysts                                                                                                                                                                                                                                                                                                                                                                                | pH/electrolyze                            | Tafel slop<br>[mV dec <sup>-1</sup> ] | overpotential<br>[mV vs RHE]                                    | durability                                                                                                                                                                      | Ref.      |
|------------------------------------------------------------------------------------------------------------------------------------------------------------------------------------------------------------------------------------------------------------------------------------------------------------------------------------------------------------------------------------------|-------------------------------------------|---------------------------------------|-----------------------------------------------------------------|---------------------------------------------------------------------------------------------------------------------------------------------------------------------------------|-----------|
| W/MnSi-SA-1                                                                                                                                                                                                                                                                                                                                                                              | pH=7 1M PBS                               | 109.38                                | 538                                                             | 0.5 mA cm <sup>-2</sup> for 6 h<br>(nearly no increase of overpotential)                                                                                                        | this work |
| W/MnSi-SA-1                                                                                                                                                                                                                                                                                                                                                                              | pH=5 1M PBS                               | 115.09                                | 603                                                             | 0.3 mA cm <sup>-2</sup> for 15 h<br>(slightly increase of overpotential about 13.5 mV)                                                                                          | this work |
| Mn <sub>2</sub> O <sub>3</sub>                                                                                                                                                                                                                                                                                                                                                           | pH=7 1M PBS                               | 111                                   | 450                                                             | 2 mA cm <sup>-2</sup> (0.39 mA cm <sup>-2</sup> by ECSA normalized) for 2 h (rapidly increase of overpotential about 80 mV)                                                     | this work |
| MnO <sub>x</sub> -573K α-Mn <sub>2</sub> O <sub>3</sub><br>Mn <sub>3</sub> O <sub>4</sub><br>α-MnO <sub>2</sub><br>β-MnO <sub>2</sub><br>γ-MnO <sub>2</sub><br>δ-MnO <sub>2</sub><br>λ-MnO <sub>2</sub><br>R-MnO <sub>2</sub><br>Mn <sub>3</sub> O <sub>4</sub><br>Mn <sub>2</sub> O <sub>3</sub><br>LiMn <sub>2</sub> O <sub>4</sub><br>Mn <sub>5</sub> O <sub>8</sub><br>nanoparticles | neutral 1M KPi<br><br>0.1 M NaPi<br>pH =7 | –                                     | 470<br><br>585                                                  | all samples displayed a fast degradation for current density during 1 h<br>these oxides showed the activities of a significant decrease during 30 min except γ-MnO <sub>2</sub> | 1<br>2    |
| Mn <sub>3</sub> (PO <sub>4</sub> ) <sub>2</sub> • 3H <sub>2</sub> O                                                                                                                                                                                                                                                                                                                      | 0.5 M NaPi<br>pH =7                       | 120                                   | 680 (0.316 mA cm <sup>-2</sup> )                                | 1.813 V vs RHE for 2 h                                                                                                                                                          | 4         |
| LiMnP <sub>2</sub> O <sub>7</sub>                                                                                                                                                                                                                                                                                                                                                        | 0.5 M NaPi<br>pH =7                       | 120                                   | 680 (0.5 mA cm <sup>-2</sup> )                                  | 1.813 V vs RHE for 2 h                                                                                                                                                          | 5         |
| activated MnO <sub>x</sub>                                                                                                                                                                                                                                                                                                                                                               | 0.1 M PBS<br>pH =7                        | ~70                                   | 470                                                             | 0.1 mA/cm <sup>2</sup> for 8 h                                                                                                                                                  | 6         |
| RuO <sub>2</sub>                                                                                                                                                                                                                                                                                                                                                                         | 0.1 M PBS<br>pH =7                        | 200                                   | 395 (2 mA cm <sup>-2</sup> )                                    | –                                                                                                                                                                               | 7         |
| IrO <sub>2</sub>                                                                                                                                                                                                                                                                                                                                                                         | 1 M PBS<br>pH =7                          | 132.1                                 | 431 (10 mA cm <sup>-2</sup> )                                   | –                                                                                                                                                                               | 8         |
| RuO <sub>2</sub>                                                                                                                                                                                                                                                                                                                                                                         | 1 M PBS<br>pH =7                          | 157                                   | ~590 (10 mA cm <sup>-2</sup> )<br>~370 (3 mA cm <sup>-2</sup> ) | 10 mA cm <sup>-2</sup> for 5.5 h<br>(increase of overpotential about 100 mV)                                                                                                    | 9         |
| IrO <sub>2</sub>                                                                                                                                                                                                                                                                                                                                                                         | neutral 1 M PBS                           | 164.7                                 | 343 (10 mA cm <sup>-2</sup> )                                   | current density was decreased by 85 % in 10 h for Pt/C-IrO <sub>2</sub>                                                                                                         | 10        |

**Table S3.** Atomic percentage (AP) of samples by XPS.

| samples | AP |
|---------|----|
|---------|----|

|               | Si    | Mn    | W    | O     |
|---------------|-------|-------|------|-------|
| MnSi-SA-0     | 23.75 | 9.51  | 0    | 66.73 |
| W/MnSi-SA-0   | 18.28 | 12.35 | 1.59 | 67.77 |
| W/MnSi-SA-1.5 | 13.09 | 16.82 | 2.61 | 67.47 |
| W/MnSi-SA-1   | 8.12  | 22.82 | 1.81 | 67.24 |
| (After OER)   |       |       |      |       |
| W/MnSi-SA-1   | 19.77 | 10.16 | 2.11 | 67.95 |

**Table S4.** Binding energy (BE) and relative peak area (PA) of O 1s, and molar percentages (MP) of M-O, Si-O and OH species of samples.

| Sample name   | BE(eV) |        |        | PA(Counts) |          |          | MP(%) |
|---------------|--------|--------|--------|------------|----------|----------|-------|
|               | M-O    | Si-O   | OH     | M-O        | Si-O     | OH       | OH    |
| MnSi-SA-0     | 529.95 | 531.68 | 532.5  | 69840.01   | 92539.84 | 150170.4 | 48    |
| W/MnSi-SA-0   | 529.74 | 531.66 | 532.5  | 109151.6   | 123928.1 | 96089.26 | 29.2  |
| W/MnSi-SA-1.5 | 530.00 | 531.68 | 532.5  | 148137.5   | 88341.35 | 61469.15 | 20.6  |
| W/MnSi-SA-1   | 529.85 | 531.37 | 525.52 | 28778.05   | 9325.445 | 12665.65 | 24.9  |
| (After OER)   |        |        |        |            |          |          |       |
| W/MnSi-SA-1   | 529.71 | 531.53 | 532.5  | 76778.95   | 56755.41 | 129701.4 | 49.3  |

**Table. S5.** Binding energy (BE) and relative peak area (PA) of W 4f, molar percentages (MP) of W<sup>5+</sup> and W<sup>6+</sup> species, and average valence state (AVS) of samples.

| Sample name   | BE(eV)            |                   |                   |                   | PA(Counts)        |                   |                   |                   | MP(%)           |                 | AVS  |
|---------------|-------------------|-------------------|-------------------|-------------------|-------------------|-------------------|-------------------|-------------------|-----------------|-----------------|------|
|               | W <sup>5+</sup>   | W <sup>5+</sup>   | W <sup>6+</sup>   | W <sup>6+</sup>   | W <sup>5+</sup>   | W <sup>5+</sup>   | W <sup>6+</sup>   | W <sup>6+</sup>   | W <sup>5+</sup> | W <sup>6+</sup> |      |
|               | 4f <sub>5/2</sub> | 4f <sub>7/2</sub> |                 |                 |      |
| MnSi-SA-0     | —                 | —                 | —                 | —                 | —                 | —                 | —                 | —                 | —               | —               | —    |
| W/MnSi-SA-0   | 36.9              | 34.8              | 37.3              | 35.2              | 6770.818          | 7452.779          | 10576.14          | 13112.23          | 37.52           | 62.48           | 5.62 |
| W/MnSi-SA-1.5 | —                 | —                 | 37.3              | 35.2              | —                 | —                 | 28839.6           | 28157.96          | —               | 100             | 6    |
| W/MnSi-SA-1   | 36.9              | 34.8              | 37.3              | 35.2              | 1242.387          | 1677.89           | 2114.248          | 2659.991          | 37.95           | 62.05           | 5.62 |
| (After OER)   |                   |                   |                   |                   |                   |                   |                   |                   |                 |                 |      |
| W/MnSi-SA-1   | 36.9              | 34.8              | 37.3              | 35.2              | 13229.69          | 18377.74          | 5762.298          | 6985.271          | 71.26           | 28.74           | 5.29 |

**Table. S6.** Binding energy (BE) and relative peak area (PA) of Mn 2p, molar percentages (MP) of Mn<sup>2+</sup>, Mn<sup>3+</sup> and Mn<sup>4+</sup> species, and average valence state (AVS)

of samples.

| Sample name   | BE(eV)            |                   |                   | PA(Counts)        |                   |                   | MP(%)            |                  |                  | AVS   |
|---------------|-------------------|-------------------|-------------------|-------------------|-------------------|-------------------|------------------|------------------|------------------|-------|
|               | Mn <sup>2+</sup>  | Mn <sup>3+</sup>  | Mn <sup>4+</sup>  | Mn <sup>2+</sup>  | Mn <sup>3+</sup>  | Mn <sup>4+</sup>  | Mn <sup>2+</sup> | Mn <sup>3+</sup> | Mn <sup>4+</sup> |       |
|               | 2p <sub>3/2</sub> |                  |                  |                  |       |
| MnSi-SA-0     | 640.82            | 642.31            | 644.17            | 48702.71          | 45085.5           | 25647.11          | 40.8             | 37.7             | 21.5             | 2.807 |
| W/MnSi-SA-0   | 640.82            | 642.32            | 644.17            | 98980.09          | 41044.57          | 21611.15          | 61.2             | 25.4             | 13.4             | 2.522 |
| W/MnSi-SA-1.5 | 640.82            | 642.32            | 644.17            | 93398.95          | 67855.68          | 45870.73          | 45.1             | 32.8             | 22.1             | 2.773 |
| W/MnSi-SA-1   | 640.82            | 642.31            | 644.18            | 14520.45          | 16910.17          | 11995.6           | 33.4             | 38.9             | 27.7             | 2.943 |
| (After OER)   |                   |                   |                   |                   |                   |                   |                  |                  |                  |       |
| W/MnSi-SA-1   | 640.81            | 642.30            | 644.13            | 71559.58          | 19375.81          | 15093.69          | 67.5             | 18.3             | 14.2             | 2.467 |

## Notes and references

- 1 A. Ramírez, P. Hillebrand, D. Stellmach, M. M. May, P. Bogdanoff and S. Fiechter, Evaluation of MnO<sub>x</sub>, Mn<sub>2</sub>O<sub>3</sub>, and Mn<sub>3</sub>O<sub>4</sub> electrodeposited films for the oxygen evolution reaction of water, *J. Phys. Chem. C*, 2014, **118**, 14073-14081.
- 2 R. Pokhrel, M. K. Goetz, S. E. Shaner, X. X. Wu and S. S. Stahl, The “Best Catalyst” for water oxidation depends on the oxidation method employed: a case study of manganese oxides, *J. Am. Chem. Soc.*, 2015, **137**, 8384-8387.
- 3 D. Jeong, K. Jin, S. E. Jerng, H. M. Seo, D. H. Kim, S. H. Nahm, S. H. Kim and K. T. Nam, Mn<sub>5</sub>O<sub>8</sub> nanoparticles as efficient water oxidation catalysts at neutral pH, *ACS Catal.*, 2015, **5**, 4624-4628.
- 4 K. Jin, J. Park, J. Lee, K. D. Yang, G. K. Pradhan, U. Sim, D. Jeong, H. L. Jang, S. Park, D. Kim, N. E. Sung, S. H. Kim, S. Han and K. T. Nam, Hydrated manganese(II) phosphate (Mn<sub>3</sub>(PO<sub>4</sub>)<sub>2</sub>·3H<sub>2</sub>O) as a water oxidation catalyst, *J. Am. Chem. Soc.*, 2014, **136**, 7435-7443.
- 5 J. Park, H. Kim, K. Jin, B. J. Lee, Y.-S. Park, H. Kim, I. Park, K. D. Yang, H.-Y. Jeong and J. Kim, A new water oxidation catalyst: lithium manganese pyrophosphate with tunable Mn valency, *J. Am. Chem. Soc.*, 2014, **136**, 4201-4211.
- 6 M. Huynh, C. Y. Shi, S. J. L. Billinge and D. G. Nocera, Nature of activated manganese oxide for oxygen evolution, *J. Am. Chem. Soc.*, 2015, **137**, 14887-14904.
- 7 Y. T. Xu, Z. M. Ye, J. W. Ye, L. M. Cao, R. K. Huang, J. X. Wu, D. D. Zhou, X. F. Zhang, C. T. He, J. P. Zhang and X. M. Chen, Non-3d metal modulation of a cobalt imidazolate framework for excellent electrocatalytic oxygen evolution in neutral media, *Angew. Chem. Int. Ed.*, 2019, **58**, 139-143.
- 8 Y. K. Zhang, C. Q. Wu, H. L. Jiang, Y. X. Lin, H. J. Liu, Q. He, S. M. Chen, T. Duan and L. Song, Atomic iridium incorporated in cobalt hydroxide for efficient oxygen evolution catalysis in neutral electrolyte, *Adv. Mater.*, 2018, **30**, 1707522.

- 9 B. B. Jiang, X. Fan, Q. Dang, F. Liao, Y. Y. Li, H. P. Lin, Z. H. Kang and M. W. Shao, Functionalization of metal oxides with thiocyanate groups: A general strategy for boosting oxygen evolution reaction in neutral media, *Nano Energy*, 2020, **76**, 105079.
- 10 F. Luo, L. Guo, Y. H. Xie, J. X. Xu, K. G. Qu, Z. H. Yang, Iridium nanorods as a robust and stable bifunctional electrocatalyst for pH universal water splitting, *Appl. Catal. B-Environ.*, 2020, **279**, 119394.
